# Supplementary material for: A design strategy for four-connected coordination frameworks
Source: Royal Society of Chemistry journal article supplement (doi:10.1039/b315243j), 2004-01-01
Supplement: b315243j.doc [file b315243j.doc]

Supplementary Information for:

### A design strategy for four–connected coordination frameworks

Oleg V. Dolomanov, David B. Cordes, Neil R. Champness,* Alexander J. Blake, Lyall R. Hanton,* Geoffrey B. Jameson, Martin Schröder and Claire Wilson

**Synthesis:**

The ligand **L**, 2,3,4,5-tetra(4-pyridyl)thiophene, was prepared via a coupling reaction of 1,2-bis(4-ethenyl)ethene with sulfur at 230˚C according to the literature procedure.1 The 1H NMR spectrum agreed with the previously reported spectrum.

**Preparation of the complexes**:

The complexes **1**, **2a**, **3** and **4** were all synthesised using a similar procedure, which involved a diffusion reaction of equimolar amounts of a solution of the appropriate metal salt in acetonitrile into a solution of **L** in chloroform. Single crystals of the complexeswere isolated directly from the reaction mixture over a period of 2 days.

**1**: Anal. Calcd for C24H16BCuF4N4S.2H2O: C, 49.80; H, 3.48; N, 9.68; Found: C, 49.10; H, 3.08; N, 9.15

**2a**: Anal. Calcd for C24H16BAgF4N4S.2H2O: C, 46.26; H, 3.23; N, 8.99; Found: C, 45.76; H, 2.69; N, 8.85

**3**: Anal. Calcd for C24H16AgF6N4SSb.2H2O: C, 37.33; H, 2.61; N, 7.26; Found: C, 36.88; H, 2.14; N, 7.20

**4**: Anal. Calcd for C25H16AgF3N4O3S2.2H2O: C, 43.81; H, 2.94; N, 8.17; Found: C, 43.59; H, 2.46; N, 8.01

**[Ag(L)BF4] 2b**: AgBF4 (25 mg, 0.13 mmol) dissolved in acetonitrile (20 mL) was added to **L** (50 mg, 0.13 mmol) dissolved in CHCl3 (20 mL). The cream solid, which precipitated was filtered and dried *in vacuo* (yield 58 mg, 77%). Colourless X-ray quality crystals were grown from the slow diffusion of a CH2Cl2 solution of **L** layered with an acetonitrile solution of AgBF4. Anal. Calcd for C24H16BAgF4N4S.H2O: C, 47.63; H, 3.00; N, 9.26; Found: C, 47.42; H, 2.99; N, 8.90.

The complexes **4** and **5** were synthesised using a similar procedure as **2b** with the appropriate silver(I) salt.

**4**: Yield 62 mg, 75%, Anal. Calcd for C25H16AgF3N4O3S2.1.5H2O: C, 44.39; H, 2.83; N, 8.28; Found: C, 44.66; H, 2.96; N, 7.95.

**5**: Yield 68 mg, 82%, Anal. Calcd for C24H16AgF6N4PS: C, 44.67; H, 2.50; N, 8.68; Found: C, 44.28; H, 2.54; N, 8.68.

**Single crystal X-ray diffraction:**

Diffraction data for **1**, **2a**, **3** and **4** were collected at 150 K on a Bruker SMART1000 CCD diffractometer (University of Nottingham) and data for **2b**, **4** and **5** were collected at 163 K on a Bruker SMART CCD diffractometer (University of Canterbury), both had graphite-monochromated Mo-*Kα* (λ = 0.71073 Å) radiation. Data for **1**, **2a**, **3** and **4** were collected using ω scans while for **2b**, **4** and **5**  and ω scans were employed. Intensities were corrected for Lonentz-polarisation effects, and scaled using symmetry-equivalent reflections. The structures were solved using direct methods (SHELXS) and all non-hydrogen atoms were located using subsequent difference-Fourier methods. Hydrogen atoms on pyridyl rings were placed in calculated positions and refined in riding mode. All non-H atoms were refined with anisotropic displacement parameters.

Investigations of compounds **1**–**5** were initiated independently at the Universities of Nottingham and Otago. Because of the large fraction of disordered electron density in the unit cell, each reciprocal lattice point has, in addition to the Bragg peak (elastic scattering), a significant contribution from thermally diffuse scattering (inelastic scattering). This leads to the appearance of a significantly large number of systematic absence violations for the I4(1)/amd space group that characterises the coordination framework. Moreover, it appears from the significant deviations, in some cases, of unit cell parameters from tetragonality (angles differing by more than 0.1 deg from 90 deg and unit cell lengths differing by more than 0.03 A, and from rather poor averaging statisitics, in all but one case, for tetragonal 4/mmm symmetry that the disordered electron density may not be ordered according to I4(1)/amd symmetry, a loss of symmetry that may have occured on cooling crystals prepared at room temperature to ~150 K for data collection. Refinements have been carried out in lower symmetry space groups (C2/c or, for a beta angle closer to 90 deg, I2/a), both with SQUEEZEd and unSQUEEZEd data, for selected members of this group of compounds. R1 and wR2 are significantly lower, even when allowing for the much larger number of parameters, but metrical details of the chemically interesting part of the crystal structure, the coordination framework polymer, are identical to those obtained from refinements conducted in space group I4(1)/amd. Refinements of the coordination framework in I4(1)/amd were judged to be prudent and accurate. Both research groups noted the same features of the X-ray crystallographic analyses which lead to further complications. All six structures show these complications which are dealt with below on an individual basis.

Refinement details for **1**:

Distance and similarity restraints were applied to B-F bonds and F…F distances. The PLATON SQUEEZE procedure was used to treat regions of diffuse solvent which could not be sensibly modelled in terms of atomic sites. Their contribution to the diffraction pattern was removed and modified *F*o2 written to a new HKL file. The number of electrons thus located, 3409 per unit cell, is included in the formula, formula weight, calculated density,  and F(000). This residual electron density was assigned to three molecules of the chloroform solvent, three half molecules of acetonitrile and a quarter of a counteranion [3409/16 = 213 e per ligand; 213 - 41x0.25 (BF4-) - 22x1.5(MeCN) = 170e. Three molecules of CHCl3 would give 174e].

Refinement details for **2a**:

X–Ray quality crystals of **2a** were grown from the slow diffusion of equimolar amounts of a solution of AgBF4 in acetonitrile into a solution of **L** in chloroform. The PLATON SQUEEZE procedure was used to treat regions of diffuse solvent which could not be sensibly modelled in terms of atomic sites. Their contribution to the diffraction pattern was removed and modified *F*o2 written to a new HKL file. The number of electrons thus located, 4240 per unit cell, is included in the formula, formula weight, calculated density,  and F(000). This residual electron density was assigned to four molecules of the chloroform solvent, a half a molecule of acetonitrile and half of a counteranion [4240/16 = 265 e per ligand; 265 - 41x0.5(BF4-) - 22x0.5(MeCN) = 233.5e. Four molecules of CHCl3 would give 232 e].

After refinement a large residual peak, possibly a Fourier ripple, of 2.064 eÅ-3 remained at 0.06 Å from the silver atom.

Refinement details for **2b**:

X–Ray quality crystals of **2b** were grown from the slow diffusion of equimolar amounts of a solution of AgBF4 in acetonitrile into a solution of **L** in dichloromethane. The PLATON SQUEEZE procedure was used to treat regions of diffuse solvent which could not be sensibly modelled in terms of atomic sites. Their contribution to the diffraction pattern was removed and modified *F*o2 written to a new HKL file. The number of electrons thus located, 2056 per unit cell, is included in the formula, formula weight, calculated density,  and F(000). This residual electron density was assigned to a half of a counteranion, three molecules of acetonitrile solvent, and a molecule of dichloromethane solvent [2056/16 = 128.5 e per ligand molecule; 128.5 - 41x0.5(BF4–) - 22x3(MeCN)= 42 e. One molecule of CH2Cl2 would give 42 e.].

Refinement details for **3**:

Distance and similarity restraints were applied to Sb-F bonds and F…F distances. The PLATON SQUEEZE procedure was used to treat regions of diffuse solvent which could not be sensibly modelled in terms of atomic sites. Their contribution to the diffraction pattern was removed and modified *F*o2 written to a new HKL file. The number of electrons thus located, 1373 per unit cell, is included in the formula, formula weight, calculated density,  and F(000). This residual electron density was assigned to a molecule of the chloroform solvent and a molecule of acetonitrile [1373/16 = 86 e per ligand; 86 - 22x1(MeCN) = 64e. A molecule of CHCl3 would give 58 e].

Refinement details for **4**:

The X–ray quality crystals of **4** grown by slow diffusion of acetonitrile and chloroform solutions yielded cell parameters and the cationic fragment of the structure which was similar to the previous structures. Unfortunately, it was not possible to locate the counteranion, presumably due to symmetry mismatch of the counteranion and the cationic part. However, crystals of **4** grown by the slow diffusion of acetonitrile and dichloromethane solutions yielded a better result. In the counteranion the C and S atoms share the same position and certain F and O atoms also share the same positions. The PLATON SQUEEZE procedure was used to treat regions of diffuse solvent which could not be sensibly modelled in terms of atomic sites. Their contribution to the diffraction pattern was removed and modified *F*o2 written to a new HKL file. The number of electrons thus estimated was included in the final formula, formula weight, calculated density,  and F(000) is 1937 per unit cell. The residual electron density was assigned to a half of a counteranion, two molecules of acetonitrile solvent, and a molecule of dichloromethane solvent [1937/16 = 121.1 e per ligand molecule. 121.1 - 73x0.5(CF3SO3–) - 22x2(MeCN)= 40.6 e. One molecule of CH2Cl2 would give 42 e.].

Refinement details for **5**:

The PLATON SQUEEZE procedure was used to treat regions of diffuse solvent which could not be sensibly modelled in terms of atomic sites. Their contribution to the diffraction pattern was removed and modified *F*o2 written to a new HKL file. The number of electrons thus estimated was included in the final formula, formula weight, calculated density,  and F(000) is 1264 per unit cell. The residual electron density was assigned to a quarter of a counteranion, one molecule of acetonitrile solvent, and one molecule of dichloromethane solvent [1264/16 = 79.0 e per ligand molecule. 79.0 - 69x0.25(PF6– ) - 22x1(MeCN)= 39.75 e. One molecule of CH2Cl2 would give 42 e.].

**Topological Analysis**

The topological analysis was conducted using the program OLEX.2 The framework structure has the same short topological term (*Schläfli symbol*) 42.84 as the zeolites EDI, THO and the same cell symmetry as NAT. The long topological term of the framework structure observed in **1**–**5**, based on the ligand node is 4.4.82.82.88.88 (based on the metal node it is 4.4.87.87.87.87) and these terms are significantly different from that seen in the zeolite structures: 42.42.84.84.84.84.

Further analysis of the topology3 of **1** - **5** provides the following analysis of the 42.84 net making up the cationic framework:

Metal node

Coordination sequence:

4, 10, 24, 42, 64, 90, 124, 204, 250

can be described by:

(5/2)K2 : K=2(10), 6(90), 10(250);

(5/2)K2+3/2 : K=1(4), 3(24), 5(64); 7(124); 9(204)

(5/2)K2+2 : K=4(42)

long topological symbol: 4.4.87.87.87.87

Ligand node

Coordination sequence:

4, 10, 24, 42, 64, 92, 124, 204, 252

can be described by:

(5/2)K2 : K=2(10)

(5/2)K2+3/2 : K=1(4), 3(24), 5(64), 7(124), 9(204)

(5/2)K2+2 : K=4(42), 6(92), 10(252)

long topological symbol: 4.4.82.82.88.88

Exact topological density: 5/6

TD10 = [978(L)+976(M)]/2 = 977

Framework density: 64 T-atoms per unit cell

(average volume = 18250 Å3) = 3.5 T-atoms/1000 Å3

References

1 S. Hünig, A. Langels, M. Schmittel, H. Wenner, I. F. Perepichka and K. Peters, *Eur. J. Org. Chem.,* 2001, 1393.

2 O. V. Dolomanov, A. J. Blake, N. R. Champness and M. Schröder, *J. Appl. Crystallogr.,* 2003, 36, 1283.

3 R. W. Grosse-Kunstleve, G. O. Brunner and N. J. A. Sloane, *Acta Crystallogr.,* 1996, **A52**, 879.
